# Supplementary material for: Matthew Boulton: Ormolu, N. Goodison
Source: MDPI journal article supplement (doi:10.3390/nu15102381), 2003-01-01
Supplement: s1 [file s1]

## Supplementary Materials

Table S1. Daily intake nutrients in different dietary regimen administered to the patient after to bariatric surgery.

| Nutrients               | Diets     |          |             |
|-------------------------|-----------|----------|-------------|
|                         | Ketogenic | Low Carb | Hypocaloric |
| Protein (g)             | 74.4      | 89.44    | 62.8        |
| Fat (g)                 | 40.5      | 46.03    | 38.27       |
| Carbohydrate (g)        | 32.8      | 97.56    | 165.53      |
| Amid (g)                | 15.8      | 52.69    | 99.79       |
| Total Fiber (g)         | 26        | 20.07    | 21.13       |
| Cholesterol (mg)        | 0         | 209.55   | 128.3       |
| Saturated Fat (g)       | 9.3       | 17.12    | 12.17       |
| Polyunsaturated Fat (g) | 1.74      | 6.68     | 4.16        |
| Monounsaturated Fat (g) | 14.66     | 32.97    | 18.94       |
| Calcium (mg)            | 255.5     | 631.41   | 816         |
| Sodium (mg)             | 85.93     | 529.15   | 733.56      |
| Potassium (mg)          | 3609.4    | 4064.38  | 3112.03     |
| Phosphorus (mg)         | 197.5     | 1287.27  | 1068.16     |
| Iron (mg)               | 3.72      | 12.74    | 10.27       |
| Zinc (mg)               | 3.91      | 18.8     | 6.87        |
| Folic Acid (µg)         | 777       | 407.31   | 370.76      |
| Niacin (mg)             | 6.43      | 18.7     | 17.04       |
| Riboflavin (mg)         | 2.9       | 1.46     | 1.67        |
| Thiamin (mg)            | 2.3       | 1.07     | 0.88        |
| Vitamin 'A' (µg)        | 538.3     | 890.06   | 1316.49     |
| Vitamin 'B6' (mg)       | 3.5       | 2.16     | 1.35        |
| Vitamin 'C' (mg)        | 219.2     | 232.81   | 283.13      |
| Vitamin 'D' (µg)        | 0         | 6.81     | 9.02        |
| Vitamin 'E' (mg)        | 25        | 10.41    | 9.95        |
| Insoluble Fiber (g)     | 10.26     | 13.63    | 11.69       |
| Soluble Fiber (g)       | 2.88      | 2.68     | 4.34        |
| Magnesium (mg)          | 521.7     | 241.91   | 223.88      |
| Copper (mg)             | 0.63      | 1.84     | 1.05        |
| Selenium (µg)           | 84.9      | 77.96    | 28.48       |
| C4:0-C10:0 (g)          | 0         | 1.85     | 0.25        |
| C12:0 Lauric (g)        | 0         | 5.81     | 0.47        |
| C14:0 Myristic (g)      | 0         | 0.72     | 1.6         |
| C16:0 Palmitic (g)      | 2.13      | 3.72     | 6.59        |
| C18:0 Stearic (g)       | 0.61      | 1.17     | 2.1         |

(continue)

| Nutrients                  | Diets     |          |             |
|----------------------------|-----------|----------|-------------|
|                            | Ketogenic | Low Carb | Hypocaloric |
| C20:0 Arachidic (g)        | 0.15      | 0.22     | 0.16        |
| C22:0 Behenic (g)          | 0         | 0        | 0           |
| C14:1 Myristoleic Acid (g) | 0         | 0        | 0.12        |
| C16:1 Palmitoleic Acid (g) | 0.16      | 0.36     | 0.42        |
| C18:1 Oleic (g)            | 14.39     | 20.17    | 18.04       |
| C20:1 Eicosaenoic (g)      | 0.06      | 0.11     | 0.06        |
| C22:1 Erucic (g)           | 0         | 0        | 0           |
| C18:2 Linoleic (g)         | 1.51      | 4.64     | 3.12        |
| C18:3 Linolenic (g)        | 0.29      | 0.73     | 0.73        |
| C20:4 Arachidonic (g)      | 0         | 0.02     | 0.06        |
| C20:5 EPA (g)              | 0         | 0.06     | 0           |
| C22:6 DHA (g)              | 0         | 0.16     | 0           |
| Phytic Acid (g)            | 0         | 0.27     | 0.27        |
| Lysine (mg)                | 239.66    | 7178.8   | 4224.59     |
| Histidine (mg)             | 1836.83   | 5147.77  | 1756.57     |
| Arginine (mg)              | 248.34    | 5357.77  | 3077.92     |
| Aspartic Acid (mg)         | 531.05    | 8249.02  | 5129.28     |
| Threonine (mg)             | 212.07    | 3758.27  | 2626.04     |
| Serine (mg)                | 230.51    | 3790.4   | 2860.65     |
| Glutamic Acid (mg)         | 1015.79   | 14262.13 | 12582.09    |
| Proline (mg)               | 235.2     | 4021.22  | 4032.32     |
| Glycine (mg)               | 272       | 4208.99  | 2280.89     |
| Alanine (mg)               | 276.98    | 5066.8   | 3064.9      |
| Cysteine (mg)              | 57.43     | 1014.03  | 1035.29     |
| Valine (mg)                | 242.61    | 4219.87  | 3415.62     |
| Methionine (mg)            | 73.2      | 2339.82  | 1377.51     |
| Isoleucine (mg)            | 175.32    | 3721.07  | 2870.24     |
| Leucine (mg)               | 337.87    | 6867.78  | 5213.72     |
| Tyrosine (mg)              | 180.1     | 3007.68  | 2056.53     |
| Phenylalanine (mg)         | 225.04    | 3793.29  | 2731.79     |
| Tryptophan (mg)            | 64.91     | 891.43   | 689.14      |
| Asparagine (mg)            | 0         | 0        | 0           |

(continue)

| Nutrients                | Diets     |          |             |
|--------------------------|-----------|----------|-------------|
|                          | Ketogenic | Low Carb | Hypocaloric |
| Glutamine (mg)           | 0         | 0        | 0           |
| Chlorine (mg)            | 0         | 0        | 0           |
| Chromium (µg)            | 0.02      | 0        | 0           |
| Fluorine (mg)            | 153.81    | 51.44    | 140.77      |
| Iodine (µg)              | 182       | 216.52   | 41.93       |
| Manganese (mg)           | 1.76      | 16.84    | 17.54       |
| Molybdenum (µg)          | 0         | 12.1     | 11.78       |
| Beta-Carotene (mg)       | 679.8     | 582.45   | 909.48      |
| Alpha-Tocopherol (mg)    | 0         | 1.35     | 0.23        |
| Vitamin K (µg)           | 0         | 6.82     | 7.26        |
| Vitamin B5 (mg)          | 1.22      | 2.53     | 2.03        |
| Vitamin B8 - Biotin (µg) | 0         | 8.42     | 14.75       |
| Vitamin B12 (µg)         | 3.75      | 7.31     | 1.03        |
| Total Polyphenols (mg)   | 556.2     | 551.4    | 723.8       |
